# Supplementary material
Source: HighWire-hosted journal article supplement (doi:10.1101/rna.035311.112)
Supplement: SuppText.docx [file SuppText.docx]

**SUPPLEMENTARY EXPERIMENTAL PROCEDURES**

**Plasmids**

To construct pCMV-5xMyc-eRF3a, cDNA encoding human eRF3a was inserted into the *Eco*RI and *Sal*I sites of pCMV-5xMyc. To construct pCMV-5xFlag-luc2, luc2 cDNA was PCR-amplifed using pGL4.16 (Promega) as a template and the primers NH0363 (sense) and NH0373 (antisense). The resulting DNA was inserted into the *Hind*III and *Xho*I sites of pCMV-5xFlag (Ruan et. al., 2010). To construct pCMV-5xFlag-GST-luc2, pCMV-5xFlag-GST-UGA-luc2, pCMV-5xFlag-GST-UAA-luc2, and pCMV-5xFlag-GST-UAG-luc2, GST cDNA fragments were generated by PCR using pGEX6P1 (GE Healthcare) as a template and either primer pair NH0235 (sense) and NH0236 (antisense), NH0235 (sense) and NH0653 (antisense), NH0235 (sense) and NH0651 (antisense), or NH0235 (sense) and NH0652 (antisense), respectively. The resulting fragments were inserted into the *Hind*III site of the pCMV-5xFlag-luc2.

Primers used in the PCR reactions were as follows.

NH0363: 5’ CAA TCC AAG CTT GTT GGT AAA GCC ACC ATG 3’

NH0373: 5’ TGC CTC GAG TTA CAC GGC GAT CTT GCC GCC 3’

NH0235: 5’ ACA GTA AAG CTT TCC CCT ATA CTA GGT TAT 3’

NH0236: 5’ CAG AAC AAG CTT ATC CGA TTT TGG AGG ATG 3’

NH0651: 5’ AAC AAG CTT TTA ATC CGA TTT TGG AGG ATG 3’

NH0652: 5’ AAC AAG CTT CTA ATC CGA TTT TGG AGG ATG 3’

NH0653: 5’ AAC AAG CTT TCA ATC CGA TTT TGG AGG ATG 3’

**Translational read through analysis**

HeLa cells were co-transfected with either pCMV-5xFlag-GST-luc2, pCMV-5xFlag-GST-UGA-luc2, pCMV-5xFlag-GST-UAA-luc2, or pCMV-5xFlag-GST-UAG-luc2 and either pCMV-5xMyc, pCMV-5xMyc, pCMV-5xMyc-eRF3b (F66A), pCMV-5xMyc-eRF3b (F75A), pCMV-5xMyc-eRF3b (F66A/F75A), or pCMV-5xMyc-eRF3b. One day later, the cells were harvested. Total cellular protein was isolated as described previously (Ruan et. al., 2010) and analyzed by western blotting using anti-Flag M2 antibody (Sigma). Expression levels of 5xFlag-GST and 5xFlag-GST-luc2 proteins were calculated using Image Gauge Ver. 4.23 (FUJIFILM) software.

**SUPPLEMENTARY RESULTS**

**The expression levels of eRF3**

The level of exogenously expressed eRF3b was examined by performing western blot analysis using an anti-eRF3 antibody (Supplementary Figure 1). Here, we used an eRF3 antibody directed against human recombinant eRF3a, which recognizes human eRF3a and 3b, but hardly detects any mouse eRF3b, since we do not have eRF3b antibody. When 5xMyc-eRF3a and 5xMyc-eRF3b were expressed in HeLa cells in a similar condition to that used in Figure 2, 5xMyc-eRF3a detected by this antibody was estimated as about ten-fold compared to the amount of endogenous eRF3 (lower panel; lane 7). As the expression levels of both 5xMyc-eRF3a and 5xMyc-eRF3b detected by an anti-Myc antibody are almost the same (upper panel; lanes 6 and 7), we conclude that the 5xMyc-eRF3b is expressed about ten-fold compared to endogenous eRF3.

**Translational read through analysis**

In order to examine the effect of PAM2 mutations of eRF3 on translation termination, a translational read-through analysis was performed. In this experiment, we have constructed a fusion gene coding for GST-lusiferase which harbors an in-frame nonsense codon (UGA, UAA, or UAG) between GST and luciferase. In this case, the GST-luciferase protein is expressed, when the efficiency of translation termination is compromised and read-through occurs at the in-frame nonsense codon.

HeLa cells were co-transfected with the GST-luciferase reporter and eRF3b mutant expression vector, and the read-through product (GST-luciferase protein) was detected by western blotting. As shown in Supplementary Figure 2, the read-through product from GST-luc (UGA) reporter was not affected by the presence of eRF3b mutants (compare lanes 8-12). Consistent with established termination efficiencies (higher at UAA and UAG than at UGA), significant amount of the read-through products were not detected for GST-luc (UAA) and GST-luc (UAG) even in the presence of eRF3b mutants. Thus we conclude that the observed effect of eRF3b mutants on the rate of deadenylation is not an indirect effect via effects on translation termination.

**SUPPLEMENTARY FIGURE 1. The levels of the overexpressed eRF3 proteins.**

**A.** Total cell lysates that were isolated from the cells at 0 h time point in Figure 2 A were analyzed by western blotting using anti-Myc (upper), anti-eRF3 (middle), or anti-GAPDH (lower).

B. The expression levels of eRF3. HeLa cells were transfected with pCMV-5xMyc (lane 5), pCMV-5xMyc-eRF3b (lane 6), or pCMV-5xMyc-eRF3a (lane 7). Total cell lysates were analyzed by western blotting using anti-Myc (upper) or anti-eRF3 (lower). Lanes 1–4, which analyzed three-fold dilutions of protein, indicate that the analysis is semi-quantitative.

**SUPPLEMENTARY FIGURE 2. Translational readthrough analysis.**

HeLa cells were co-transfected with either pCMV-5xFlag-GST-luc2 (lanes 1–7), pCMV-5xFlag-GST-UGA-luc2 (lanes 8–12), pCMV-5xFlag-GST-UAA-luc2 (lanes 13–17), or pCMV-5xFlag-GST-UAG-luc2 (lanes 18–22) and either pCMV-5xMyc (lanes 1–8, 13, and 18), pCMV-5xMyc-eRF3b (F66A) (lanes 9, 14, and 19), pCMV-5xMyc-eRF3b (F75A) (lanes 10, 15, and 20), pCMV-5xMyc-eRF3b (F66A/F75A) (lanes 11, 16, and 21), or pCMV-5xMyc-eRF3b (lanes 12, 17, and 22). One day later, the cells were harvested. Total cellular protein was analyzed by western blotting using anti-Flag antibody. Lanes 1–7, which analyzed three-fold dilutions of protein, indicate that the analysis is semi-quantitative. A relatively dark exposure was required for detection of 5xFlag-GST-luc2 proteins (lower panel, lanes 8–12). Numbers immediately below each lane represent the level of 5xFlag-GST-luc2 protein normalized to the level of 5xFlag-GST protein. The asterisks indicate an uncharacterized protein that did not interfere with experimental interpretations. N.D. indicates that the 5xFlag-GST-luc2 protein was not detected. Results are representative of three independently performed experiments.
